# Supplementary material
Source: PubMed Central journal article supplement (PMC194902)
Supplement: 1471-2288-3-8-s1.pdf [file 1471-2288-3-8-s1.pdf]

## Appendix

Under our formulation  $bias = \sum_s \psi_s \epsilon_s w_s$ , where  $\psi_s$  is the maximum possible bias if there were complete confounding of the unobserved covariate and treatment,  $w_s$  is the known fraction of subjects in stratum  $s$ , and

$$\epsilon_s = pr(X = 1|1, s, R = 1) - pr(X = 0|1, s, R = 1). \quad (\text{A1})$$

By invoking the randomization, we can obtain an upper bound on  $\epsilon_s$ . Let

$$\begin{aligned} \gamma_s &= pr(X = 1 | s) \\ &= pr(X = 1 | z, s) \text{ as a consequence of the randomization.} \end{aligned} \quad (\text{A2})$$

In other words the randomization guarantees that the distribution of  $X$  does not depend on treatment assignment. Let

$$\kappa_{zs} = \frac{pr(R=1|z,s,X=0)}{pr(R=1|z,s,X=1)}, \quad (\text{A3})$$

namely, the relative risk of missingness for  $X = 1$  versus  $X = 0$  among subjects randomized to  $z$  in stratum  $s$ . Writing (A1) as

$$\begin{aligned} \epsilon_s &= \frac{pr(X=1, R=1 | Z=1, s)}{\sum_x pr(x, R=1 | Z=1, s)} - \frac{pr(X=1, R=1 | Z=0, s)}{\sum_x pr(x, R=1 | Z=0, s)} \\ &= \frac{pr(R=1 | Z=1, s, X=1) pr(X=1 | Z=1, s)}{\sum_x pr(R=1 | Z=1, s, x) pr(x | Z=1, s)} - \frac{pr(R=1 | Z=0, s, X=1) pr(X=1 | Z=0, s)}{\sum_x pr(R=1 | Z=0, s, x) pr(x | Z=0, s)}, \end{aligned}$$

and substituting (A2) and (A3) gives

$$\epsilon_s = \frac{\gamma_s}{\gamma_s + \kappa_{1s}(1-\gamma_s)} - \frac{\gamma_s}{\gamma_s + \kappa_{0s}(1-\gamma_s)}. \quad (\text{A4})$$

If  $\kappa_{1s} = \kappa_{0s}$ , namely the relative risk for missingness between  $X = 0$  and  $X = 1$  is the same in the two treatment groups,  $\epsilon_s = 0$  and there is no bias. This is a weaker condition than MAR which requires that  $\kappa_{zs} = 1$ , namely that missingness does not depend on  $X$ .

Remarkably, it is possible to obtain an upper bound on  $\epsilon_s$  given only

$$\tau_s = \frac{\kappa_{0s}}{\kappa_{1s}}, \quad (\text{A5})$$

which is the ratio between treatment groups of the relative risk of a missing outcome for  $X = 0$  versus  $X = 1$ . To find the maximum of  $\epsilon_s$  given  $\tau_s$ , we substitute (A5) into (A4) with  $\kappa_{0s} = \tau_s \kappa_{1s}$  and set  $\partial \epsilon_s / \partial \gamma_s = 0$  and  $\partial \epsilon_s / \partial \kappa_{1s} = 0$ . This gives

$$g_s = \sqrt{\tau_s} \kappa_{1s} / (1 + \sqrt{\tau_s} \kappa_{1s}) \text{ for } \kappa_{1s} > 0. \quad (\text{A6})$$

Substituting (A6) into (A4) gives the unconstrained maximum for  $\epsilon_s$ ,

$$\epsilon_{Ms} = \frac{\sqrt{\tau_s} - 1}{\sqrt{\tau_s} + 1}. \quad (\text{A7})$$

Because of constraints on some probabilities the maximum in (A7) is not always attained. The following discussion elucidates the constraints. To simplify the notation we drop the subscript  $s$ . Define  $\theta_{zx} = pr(R = 1 | z, x)$  so  $\kappa_z = \theta_{z0} / \theta_{z1}$ . The maximum value of  $\epsilon$  in (A7) implicitly assumes  $\theta_{zx} \leq 1$ . To investigate violations of this constraint we begin with the identity

$$\begin{aligned}
\pi_z &= pr(R = 1 | z), \\
&= pr(R = 1 | z, X = 1)pr(X = 1 | z) + pr(R = 1 | z, X = 0)pr(X = 0 | z) \\
&= \theta_{z1}(\gamma + \kappa_z(1 - \gamma)).
\end{aligned} \tag{A8}$$

We can rewrite (A8) as

$$\theta_{z1} = \pi_z / (\gamma + \kappa_z(1 - \gamma)). \tag{A9}$$

Substituting (A9) into the constraint that  $\theta_{z0} = \theta_{z1}\kappa_z \leq 1$ , rewriting in terms of  $\kappa_1$  and  $\kappa_0 = \tau \kappa_1$ , and solving for  $\kappa_1$  gives

$$\kappa_1 \geq \begin{cases} \frac{\pi_1 - \gamma}{1 - \gamma}, & \text{if } \gamma < \pi_1, \\ 0, & \text{if } \gamma \geq \pi_1, \end{cases} \tag{A10a}$$

$$\kappa_1 \geq \begin{cases} \frac{\pi_0 - \gamma}{\tau(1 - \gamma)}, & \text{if } \gamma < \pi_0, \\ 0, & \text{if } \gamma \geq \pi_0, \end{cases} \tag{A10b}$$

Substituting (A9) into the constraint that  $\theta_{z1} \leq 1$ , rewriting in terms of  $\kappa_1$  and  $\kappa_0 = \tau \kappa_1$ , and solving for  $\kappa_1$  gives

$$\kappa_1 \leq \begin{cases} \frac{\gamma}{\pi_1 - (1 - \gamma)}, & \text{if } \gamma > 1 - \pi_1, \\ \infty, & \text{if } \gamma \leq 1 - \pi_1, \end{cases} \tag{A11a}$$

$$\kappa_1 \leq \begin{cases} \frac{\gamma}{\tau(\pi_0 - (1 - \gamma))}, & \text{if } \gamma > 1 - \pi_0, \\ \infty, & \text{if } \gamma \leq 1 - \pi_0. \end{cases} \tag{A11b}$$

Equations (A10a) and (A10b) represent lower bounds and (A11a) and (A11b) represent upper bounds on  $\kappa_1$ . For these bounds to be operable, the following conditions must hold:

*Condition 1.* (A10a)  $\leq$  (A11a). If  $\gamma \leq 1 - \pi_1$ , (A11a) is infinity so the condition holds. If  $\gamma > 1 - \pi_1$ , this condition reduces to  $(1 - \pi_1) \pi_1 \geq 0$ , which always holds.

*Condition 2.* (A10b)  $\leq$  (A11b). If  $\gamma \leq 1 - \pi_0$ , (A11b) is infinity, so the condition always holds. If  $\gamma > 1 - \pi_0$ , this condition reduces to  $\tau(1 - \pi_0) \pi_0 \geq 0$ , which always holds because  $\tau \geq 0$ .

*Condition 3.* (A10a)  $\leq$  (A11b) If  $\gamma \leq 1 - \pi_0$ , (A11b) is infinity so the condition always holds. If  $\gamma > 1 - \pi_1$ , we compute the bound on  $\tau$  when (A6) and hence (A7) hold. Substituting (A7) into (A10a) and (A11b) and solving for  $\kappa_1$  gives

$$\frac{\pi_1}{1 + \sqrt{\tau}(1 - \pi_1)} \leq \kappa_1 \leq \frac{\sqrt{\tau}(1 - \pi_0) + 1}{\tau \pi_0} \quad (\text{A12})$$

Setting the lower bound of (A12) less than or equal to the upper bound of (A12) gives the requirement for (A6) and hence (A7) to hold, namely,  $1/\sqrt{\tau} \geq \pi_0 + \pi_1 - 1$ . Thus if  $\pi_0 + \pi_1 \leq 1$  or  $\tau \leq 1/(\pi_0 + \pi_1 - 1)^2$ , we can obtain the maximum value of  $\epsilon$  in (A7). If instead  $\tau > 1/(1 - \pi_0 - \pi_1)^2$  and  $\pi_0 + \pi_1 > 1$ , we find the largest value of  $\epsilon$  by computing the two possible values of  $\gamma$ , which are the solutions to a quadratic equation, at the boundary condition (A10a) = (A11b),

$$\gamma_U = \frac{\zeta \pm \sqrt{\zeta^2 - 4\pi_1(1 - \pi_0)\tau(\tau - 1)}}{2(\tau - 1)}, \text{ where } \zeta = -1 - \pi_0\tau + \pi_1\tau + \tau. \quad (\text{A13})$$

Substituting (A13) into (A10a) gives  $\kappa_{1U} = (\pi_1 - \gamma_U)/(1 - \gamma_U)$ . Substituting (A13) and  $\kappa_{1U}$  into (A4) gives

$$\epsilon_U = \begin{cases} \max(\epsilon_U^*), & \text{if } \tau \geq 1, \\ \min(\epsilon_U^*), & \text{if } \tau < 1, \end{cases} \text{ where } \epsilon_U^* = \frac{\gamma_U}{\gamma_U + \kappa_{1U}(1-\gamma_U)} - \frac{\gamma_U}{\gamma_U + \tau \kappa_{1U}(1-\gamma_U)} \quad (\text{A14})$$

Because  $g_U$  represents two possible solutions, the notation in (A14) indicates that we select the  $g_U$  solution that gives the largest  $\epsilon_U$  when  $\tau \geq 1$  and the smallest  $\epsilon_U$  when  $\tau < 1$ .

*Condition 4.* (A2b)  $\leq$  (A3a) If  $\gamma \leq 1 - \pi_1$ , (A3a) is infinity so (A2b)  $\leq$  (A3a). If  $\gamma > 1 - \pi_1$ , we compute the bound on  $\tau$  when (A6) and hence (A7) holds. Substituting (A6) into (A10b) and (A11a) and solving for  $\kappa_1$  gives

$$\frac{\pi_0}{\tau + \sqrt{\tau}(1-\pi_0)} \leq \kappa_1 \leq \frac{\sqrt{\tau} + (1-\pi_1)}{\pi_1 \sqrt{\tau}}. \quad (\text{A15})$$

Setting the lower bound of (A15) less than or equal to the upper bound of (A14) gives the requirement that for (A6) and hence (A7) to hold,  $\sqrt{\tau} \geq \pi_0 + \pi_1 - 1$ . Thus if  $\pi_0 + \pi_1 \leq 1$  or  $\tau \geq (1 - \pi_0 - \pi_1)^2$ , we can obtain the maximum value of  $\epsilon$  in (A7). If instead,  $\tau < (1 - \pi_0 - \pi_1)^2$  and  $\pi_0 + \pi_1 > 1$ , we find the largest value of  $\epsilon$  by computing the two possible values of  $\gamma$  at the boundary condition (A10b) = (A11a),

$$\gamma_L = \frac{\beta \pm \sqrt{\beta^2 - 4\pi_0(1-\pi_1)(1-\tau)}}{2(1-\tau)}, \quad \text{where } \beta = 1 + \pi_0 - \pi_1 - \tau. \quad (\text{A16})$$

Substituting (A16) into (A11a) gives  $\kappa_{1L} = \gamma_L / (\pi_1 - (1 - \gamma_L))$ . Substituting (A16) and  $\kappa_{1L}$  into (A4) gives

$$\epsilon_L = \begin{cases} \max(\epsilon_L^*), & \text{if } \tau \geq 1, \\ \min(\epsilon_L^*), & \text{if } \tau < 1, \end{cases} \text{ where } \epsilon_L^* = \frac{\gamma_L}{\gamma_L + \kappa_{1L}(1-\gamma_L)} - \frac{\gamma_L}{\gamma_L + \tau \kappa_{1L}(1-\gamma_L)}. \quad (\text{A17})$$

Because  $\gamma_L$  represents two possible solutions, the notation in (A17) indicates that we select the  $\gamma_L$  solution that gives the largest  $\epsilon_L$  when  $\tau \geq 1$  and the smallest  $\epsilon_L$  when  $\tau < 1$ .

Reintroducing the subscript  $s$ , combining (A7), (A13) (A14), (A16), (A17), the attained maximum of  $\epsilon_s$ , which depends only on  $\tau_s$  and  $\pi_{zs}$ , is

$$\epsilon_s^*(\tau_s; \pi_{zs}) = \begin{cases} \epsilon_{Ms}, & \text{if } (1-\pi_{0s}-\pi_{1s})^2 \leq \tau_s \leq 1/(1-\pi_{0s}-\pi_{1s})^2 \text{ or } \pi_{0s} + \pi_{1s} \leq 1, \\ \epsilon_{Ls}, & \text{if } \tau_s < (1-\pi_{0s}-\pi_{1s})^2 \text{ and } \pi_{0s} + \pi_{1s} > 1, \\ \epsilon_{Us}, & \text{if } \tau_s > 1/(1-\pi_{0s}-\pi_{1s})^2 \text{ and } \pi_{0s} + \pi_{1s} > 1. \end{cases} \quad (\text{A18})$$

Because the choice of  $\tau_s$  versus  $1/\tau_s$  is arbitrary, as either 0 or 1 can be assigned to  $X$ , it is reassuring that  $\epsilon_s^*(\tau_s; \pi_{zs}) = -\epsilon_s^*(1/\tau_s; \pi_{zs})$ . If we take the limit as  $\tau_s$  approaches 0 or infinity then  $\epsilon_{Ls}$  and  $\epsilon_{Us}$  apply, giving

$$\epsilon_{(max)s} = \max\left(\frac{1-\pi_{0s}}{\pi_{1s}}, \frac{1-\pi_{1s}}{\pi_{0s}}\right). \quad (\text{A19})$$

Numerically we checked that  $\epsilon_{(max)s}$  is greater than or equal to  $\epsilon_{Ms}$ .
